# Supplementary material for: Location-Based Test Case Prioritization for Software Embedded in Mobile Devices Using the Law of Gravitation
Source: Hindawi journal article supplement (doi:10.1155/2019/9083956), 2019-01-02
Supplement: f1 [file 9083956.f1.zip]

Archive with 3 entries (3 files):
- 9083956.f1/chiptest.xlsx
- 9083956.f1/result analysis.xlsx
- 9083956.f1/results.xlsx
