# Supplementary material for: Location-Based Test Case Prioritization for Software Embedded in Mobile Devices Using the Law of Gravitation
Source: Hindawi journal article supplement (doi:10.1155/2019/9083956), 2019-01-02
Supplement: f1 [file 9083956.f1.zip › 9083956.f1/chiptest.xlsx]

## Sheet: 9
	requirements(5) test cases	LUBAN-935	LUBAN-936	LUBAN-1137	LUBAN-987	LUBAN-1091	requirement levels				T/D	M/DL	F	m		r	f2	f3
1	LUBAN-1226	√					4	3			t1	2	f2	2.5		t1	1	1
2	LUBAN-1227		√				1	2			t2	1	f3	1.5		t2	8	8
3	LUBAN-1230			√			3	2			t3	2				t3	10	10
4	LUBAN-1234				√		2	1			t4	3				t4	10	10
5	LUBAN-1260				√		5	1			t5	3				t5	30	30
6	LUBAN-1261				√						t6	3				t6	100	100
7	LUBAN-1262			√			Device area divisions	device representatives			t7	2				t7	60	60
8	LUBAN-1265					√	1，2，3，4	1，7			t8	1				t8	200	200
9	LUBAN-1300	√					5，6，7，8，9	F:f2，f3			t9	2				t9	80	80
												f1	f2	f3	f4	f5	f6	f7	F	FL	FS
											t1		√	√					f1	1	1
											t2	√			√				f2	3	2.5
											t3					√			f3	1	1.5
	faults(7) T	CR-90686	CR-90588	CR-90577	CR-90571	CR-90293	CR-90267	CR-90261			t4						√	√	f4	1	1
1	LUBAN-1226		√	√							t5								f5	3	2.5
2	LUBAN-1227	√			√						t6								f6	4	3.5
3	LUBAN-1230					√					t7								f7	5	4
4	LUBAN-1234						√	√			t8
5	LUBAN-1260										t9
6	LUBAN-1261
7	LUBAN-1262
8	LUBAN-1265
9	LUBAN-1300

## Sheet: 10
	requirements(9) T	LUBAN-1263	LUBAN-926	LUBAN-886	LUBAN-1216	LUBAN-1327	LUBAN-1256	LUBAN-1259	LUBAN-1376	LUBAN-1218			T/D	M/DL	F	m		r	f3	f5	f6
1	LUBAN-1275	√											t1	2	f3	3		t1	50	40	40
2	LUBAN-1328		√										t2	1	f5	4		t2	45	40	40
3	LUBAN-1390			√									t3	2	f6	2.5		t3	42	30	30
4	LUBAN-1391				√								t4	3				t4	98	58	58
5	LUBAN-1392					√							t5	3				t5	107	95	95
6	LUBAN-1393						√						t6	3				t6	192	180	180
7	LUBAN-1395							√					t7	2				t7	40	30	30
8	LUBAN-1396								√				t8	1				t8	160	152	152
9	LUBAN-1397									√			t9	2				t9	180	168	168
													t10	2				t10	15	10	10
													t11	1				t11	70	30	30
	F(8) T	CR-94028	CR-93377	CR-92449	CR-82884	CR-97255	CR-93907	CR-94969	CR-94130	requirement levels			t12	3				t12	80	25	25
1	LUBAN-1275	√	√							1	4		t13	3				t13	12	1	1
2	LUBAN-1328									2	1		t14	4				t14	1	12	12
3	LUBAN-1390									3	5		t15	2				t15	15	20	20
4	LUBAN-1391					√	√			4	2		t16	2				t16	30	40	40
5	LUBAN-1392			√						5	1		t17	5				t17	25	5	5
6	LUBAN-1393									6	2		t18	1				t18	40	50	50
7	LUBAN-1395									7	3
8	LUBAN-1396				√			√	√	8	4			f1	f2	f3	f4	f5	f6	f7	f8	F	FL	FS
9	LUBAN-1397									9	2		t1									f1	3	2.5
													t2									f2	4	3
	https://wetrack.advantest.com/browse/LUBAN-1218									Device area divisions	device representatives		t3									f3	2	3
										1，2，3，4,5	2,9,13,14		t4									f4	3	4
										6,8,9			t5									f5	5	4
										7,11,12,13			t6									f6	2	2.5
										10,14,15,16,17	F:f3,f5,f6		t7									f7	4	4.5
													t8									f8	1	3
													t9
													t10	√	√
													t11
													t12
													t13					√	√
													t14			√
													t15
													t16
													t17				√			√	√
													t18

## Sheet: 11
	R(5) T	LUBAN-1389	LUBAN-1387	LUBAN-1257	LUBAN-1461	LUBAN-1384			T/D	M/DL	F	m		r	f1
1	LUBAN-1435	√							t1	2	f1	3		t1	100
2	LUBAN-1438		√						t2	1				t2	106
3	LUBAN-1440			√					t3	2				t3	80
4	LUBAN-1484				√				t4	3				t4	90
5	LUBAN-1498					√			t5	3				t5	123
									t6	3				t6	116
									t7	2				t7	20
									t8	1				t8	50
	F(5) T	CR-97161	CR-95279	CR-94034	CR-92391	CR-94000	requirement levels		t9	2				t9	100
1	LUBAN-1435						1	3	t10	2				t10	78
2	LUBAN-1438						2	2	t11	1				t11	40
3	LUBAN-1440	√					3	2	t12	3				t12	50
4	LUBAN-1484		√	√			4	5	t13	3				t13	60
5	LUBAN-1498				√	√	5	1	t14	4				t14	87
									t15	2				t15	75
							Device area divisions	device representatives	t16	2				t16	60
							1，2，3，4,5	2,8,11,15,21	t17	5				t17	70
							6,8,9,19,20		t18	1				t18	50
							7,11,12,13	F:f1	t19	3				t19	40
							10,14,15,16,17		t20	1				t20	50
							21,22,23		t21	1				t21	1
									t22	2				t22	5
									t23	4				t23	10
										f1	f2	f3	f4	f5	F	FL	FS
									t1						f1	5	3
									t2						f2	1	1.5
									t3						f3	4	3
									t4						f4	1	2.5
									t5						f5	2	3
									t6
									t7
									t8
									t9
									t10
									t11
									t12
									t13
									t14
									t15
									t16
									t17
									t18
									t19
									t20
									t21	√
									t22		√	√
									t23				√	√

## Sheet: 12
	R(8) T	LUBAN-772	LUBAN-1377	LUBAN-1527	LUBAN-1501	LUBAN-1519	LUBAN-1410	LUBAN-1524	LUBAN-1530		T/D	M/DL	F	m		r	f1	f2
1	LUBAN-1273	√									t1	2	f1	3		t1	120	120
2	LUBAN-1439		√								t2	1	f2	2		t2	128	128
3	LUBAN-1507			√							t3	2				t3	127	127
4	LUBAN-1609				√						t4	3				t4	115	115
5	LUBAN-1630					√					t5	3				t5	85	85
6	LUBAN-1631						√				t6	3				t6	25	25
7	LUBAN-1632							√			t7	2				t7	180	180
8	LUBAN-1634								√		t8	1				t8	117	117
											t9	2				t9	35	35
											t10	2				t10	252	252
											t11	1				t11	210	210
	F(8) T	CR-98595	CR-101922	CR-102374	CR-102230	CR-96657	CR-97161	CR-97158	CR-101730		t12	3				t12	220	220
1	LUBAN-1273	√									t13	3				t13	247	247
2	LUBAN-1439										t14	4				t14	265	265
3	LUBAN-1507										t15	2				t15	250	250
4	LUBAN-1609										t16	2				t16	240	240
5	LUBAN-1630		√								t17	5				t17	200	200
6	LUBAN-1631										t18	1				t18	230	230
7	LUBAN-1632			√	√	√					t19	3				t19	122	122
8	LUBAN-1634						√	√	√		t20	1				t20	120	120
											t21	1				t21	150	150
											t22	2				t22	145	145
											t23	4				t23	140	140
											t24	4				t24	15	15
								requirement levels			t25	2				t25	18	18
								1	3		t26	1				t26	22	22
								2	2		t27	1				t27	15	15
								3	2		t28	2				t28	10	10
								4	5		t29	1				t29	30	30
								5	1		t30	1				t30	1	1
								6	4		t31	1				t31	17	17
								7	3
								8	1			f1	f2	f3	f4	f5	f6	f7	f8	F	FL	FS
											t1									f1	5	4.5
								Device area divisions			t2									f2	4	3
								1，2，3，4,5			t3									f3	5	3
								6,9,24,25,26,27,28,29,30,31			t4									f4	3	2
								8,19,20			t5									f5	1	1
								7,11,12,13	device representatives		t6									f6	2	1.5
								10,14,15,16,17	2,30,19,11,15,21		t7									f7	2	1.5
								21,22,23			t8									f8	1	1
									F:f3,f4		t9
											t10
											t11
											t12
											t13
											t14
											t15
											t16
											t17
											t18
											t19
											t20
											t21
											t22
											t23
											t24	√
											t25
											t26
											t27
											t28		√
											t29
											t30			√	√	√
											t31						√	√	√

## Sheet: 13
	R(7) T	LUBAN-1461	LUBAN-1604	LUBAN-1464	LUBAN-1373	LUBAN-1605	LUBAN-1751	LUBAN-1765		T/D	M/DL	F	m		r	f1	f2
1	LUBAN-1484	√								t1	2	f1	3.5		t1	18	18
2	LUBAN-1735		√							t2	1	f2	2		t2	10	10
3	LUBAN-1774			√						t3	2				t3	18	18
4	LUBAN-1775				√					t4	3				t4	26	26
5	LUBAN-1776					√				t5	3				t5	45	45
6	LUBAN-1778						√			t6	3				t6	118	118
7	LUBAN-1790							√		t7	2				t7	70	70
										t8	1				t8	210	210
										t9	2				t9	95	95
										t10	2				t10	48	48
	F(7) T	CR-95279	CR-94034	CR-103470	CR-99696	CR-93526	CR-97481	CR-90963		t11	1				t11	30	30
1	LUBAN-1484	√	√							t12	3				t12	20	20
2	LUBAN-1735			√	√					t13	3				t13	43	43
3	LUBAN-1774					√	√			t14	4				t14	58	58
4	LUBAN-1775							√		t15	2				t15	68	68
5	LUBAN-1776									t16	2				t16	77	77
6	LUBAN-1778									t17	5				t17	31	31
7	LUBAN-1790									t18	1				t18	86	86
							requirement levels			t19	3				t19	213	213
							1	4		t20	1				t20	220	220
							2	5		t21	1				t21	90	90
							3	1		t22	2				t22	98	98
							4	5		t23	4				t23	106	106
							5	3		t24	4				t24	123	123
							6	2		t25	2				t25	117	117
							7	1		t26	1				t26	98	98
										t27	1				t27	127	127
										t28	2				t28	130	130
							Device area divisions			t29	1				t29	115	115
							1，2，3，4,5,32,33,34,35,36,37			t30	1				t30	140	140
							6,9,24,25,26,27,28,29,30,31			t31	1				t31	128	128
							8,19,20			t32	3				t32	1	1
							7,11,12,13	device representatives		t33	2				t33	15	15
							10,14,15,16,17,38	32,30,19,11,15,21		t34	1				t34	10	10
							21,22,23			t35	3				t35	18	18
								F:f1,f2		t36	3				t36	13	13
										t37	2				t37	20	20
										t38	3				t38	33	33
											f1	f2	f3	f4	f5	f6	f7	F	FL	FS
										t1								f1	5	3.5
										t2								f2	2	2
										t3								f3	3	2.5
										t4								f4	4	3
										t5								f5	5	3
										t6								f6	2	1.5
										t7								f7	3	3
										t8
										t9
										t10
										t11
										t12
										t13
										t14
										t15
										t16
										t17
										t18
										t19
										t20
										t21
										t22
										t23
										t24
										t25
										t26
										t27
										t28
										t29
										t30
										t31
										t32	√	√
										t33			√	√
										t34					√	√
										t35							√
										t36
										t37
										t38

## Sheet: 14
	R(16) T	LUBAN-1323	LUBAN-1602	LUBAN-1828	LUBAN-1812	LUBAN-1817	LUBAN-1853	LUBAN-1860	LUBAN-1762	LUBAN-1643	LUBAN-1760	LUBAN-1792	LUBAN-1862	LUBAN-1604	LUBAN-1723	LUBAN-1806	LUBAN-1811
1	LUBAN-1877	√
2	LUBAN-1873		√
3	LUBAN-1869			√
4	LUBAN-1871				√
5	LUBAN-1867					√
6	LUBAN-1782						√
7	LUBAN-1875							√
8	LUBAN-1781								√
9	LUBAN-1738									√
10	LUBAN-1780										√
11	LUBAN-1868											√
12	LUBAN-1866												√
13	LUBAN-1735													√
14	LUBAN-1870														√
15	LUBAN-1820															√
16	LUBAN-1872																√
	F(8) T	CR-100881	CR-101352	CR-102374	CR-102230	CR-102363	CR-101978	CR-103470	CR-99993		T/D	M/DL	F	m		r	f1	f3
1	LUBAN-1877										t1	2	f1	1.5		t1	270	225
2	LUBAN-1873										t2	1	f3	3.5		t2	276	233
3	LUBAN-1869										t3	2				t3	265	235
4	LUBAN-1871	√									t4	3				t4	260	215
5	LUBAN-1867		√								t5	3				t5	276	223
6	LUBAN-1782			√	√	√					t6	3				t6	250	80
7	LUBAN-1875										t7	2				t7	66	76
8	LUBAN-1781										t8	1				t8	56	25
9	LUBAN-1738										t9	2				t9	50	23
10	LUBAN-1780										t10	2				t10	200	260
11	LUBAN-1868						√				t11	1				t11	76	90
12	LUBAN-1866										t12	3				t12	84	100
13	LUBAN-1735							√			t13	3				t13	100	120
14	LUBAN-1870								√		t14	4				t14	200	280
15	LUBAN-1820										t15	2				t15	190	260
16	LUBAN-1872										t16	2				t16	175	246
											t17	5				t17	210	240
											t18	1				t18	160	240
											t19	3				t19	50	28
											t20	1				t20	46	20
							requirement levels				t21	1				t21	50	52
							1	1			t22	2				t22	42	44
							2	2			t23	4				t23	35	36
							3	2			t24	4				t24	300	100
							4	5			t25	2				t25	280	60
							5	4			t26	1				t26	312	100
							6	3			t27	1				t27	290	70
							7	2			t28	2				t28	320	80
							8	1			t29	1				t29	270	50
							9	1			t30	1				t30	310	85
							10	3			t31	1				t31	310	105
							11	5			t32	3				t32	270	243
							12	2			t33	2				t33	274	246
							13	3			t34	1				t34	271	253
							14	4			t35	3				t35	272	238
							15	1			t36	3				t36	270	234
							16	1			t37	2				t37	262	234
											t38	3				t38	250	241
							Device area divisions				t39	2				t39	30	33
							1，2，3，4,5,32,33,34,35,36,37				t40	3				t40	20	45
							6,9,24,25,26,27,28,29,30,31				t41	2				t41	16	34
							8,19,20,44,52,53				t42	1				t42	1	36
							7,11,12,13	device representatives			t43	3				t43	18	18
							10,14,15,16,17,38	32,30,19,11,15,42,44			t44	2				t44	32	1
							21,22,23,39,40,41,42,43,45,46,47,48,49,50,51,54				t45	4				t45	30	56
								F:f1,f3			t46	2				t46	40	50
											t47	1				t47	56	43
											t48	2				t48	35	60
											t49	1				t49	8	46
											t50	2				t50	24	26
											t51	1				t51	14	27
											t52	3				t52	38	13
											t53	4				t53	38	20
											t54	5				t54	35	40
												f1	f2	f3	f4	f5	f6	f7	f8	F	FL	FS
											t1									f1	2	1.5
											t2									f2	3	3
											t3									f3	5	3.5
											t4									f4	2	2
											t5									f5	1	1.5
											t6									f6	4	2.5
											t7									f7	2	1.5
											t8									f8	5	4
											t9
											t10
											t11
											t12
											t13
											t14
											t15
											t16
											t17
											t18
											t19
											t20
											t21
											t22
											t23
											t24
											t25
											t26
											t27
											t28
											t29
											t30
											t31
											t32
											t33
											t34
											t35
											t36
											t37
											t38
											t39
											t40
											t41
											t42	√
											t43		√
											t44			√	√	√
											t45
											t46
											t47
											t48
											t49						√
											t50
											t51							√
											t52								√
											t53
											t54
