# Supplementary material for: Location-Based Test Case Prioritization for Software Embedded in Mobile Devices Using the Law of Gravitation
Source: Hindawi journal article supplement (doi:10.1155/2019/9083956), 2019-01-02
Supplement: f1 [file 9083956.f1.zip › 9083956.f1/result analysis.xlsx]

## Sheet: 箱线图
v-9								v-10
TC	AC	R	PORT	L-TCP				TC	AC	R	PORT	L-TCP
42.06	29.37	19.84	45.24	78.57				62.5	65.28	56.25	72.22	88.19
61.11	56.35	34.13	51.59	78.57				72.92	52.08	22.22	64.58	88.19
56.35	26.19	24.6	40.48	78.57				65.97	70.83	58.33	68.75	88.19
26.19	42.06	29.37	40.48	78.57				67.36	70.14	15.97	68.75	88.19
29.37	43.65	65.87	43.65	78.57				66.67	75.69	42.36	69.44	88.19
32.54	34.13	32.54	42.06	78.57				64.58	78.47	61.11	68.75	88.19
38.89	61.11	37.3	38.89	78.57				72.92	79.17	49.31	63.89	88.19
26.19	29.37	37.3	46.83	78.57				22.22	68.75	38.89	68.75	88.19
40.48	34.13	56.35	45.24	78.57				67.36	31.94	36.81	64.58	88.19
37.3	26.19	38.89	46.83	78.57				67.36	72.22	31.94	70.83	88.19
30.95	32.54	42.06	45.24	78.57				68.75	59.03	38.19	65.97	88.19
24.6	35.71	29.37	51.59	78.57				61.81	67.36	53.47	70.83	88.19
40.48	26.19	30.95	46.83	78.57				74.31	22.22	40.97	63.19	88.19
50	61.11	50	38.89	78.57				60.42	69.44	34.03	63.19	88.19
38.89	35.71	46.83	46.83	78.57				69.44	71.53	51.39	65.97	88.19
29.37	65.87	42.06	42.06	78.57				59.72	69.44	36.11	70.14	88.19
61.11	34.13	45.24	45.24	78.57				31.94	68.06	52.78	67.36	88.19
40.48	24.6	43.65	45.24	78.57				72.22	69.44	53.47	64.58	88.19
65.87	30.95	34.13	38.89	78.57				68.06	79.86	65.97	68.75	88.19
24.6	35.71	50	43.65	78.57				60.42	72.92	46.53	70.83	88.19
					TC	AC	R	PORT	L-TCP
				v-9	42.06	29.37	19.84	45.24	78.57
				v-9	61.11	56.35	34.13	51.59	78.57
				v-9	56.35	26.19	24.6	40.48	78.57
				v-9	26.19	42.06	29.37	40.48	78.57
				v-9	29.37	43.65	65.87	43.65	78.57
				v-9	32.54	34.13	32.54	42.06	78.57
				v-9	38.89	61.11	37.3	38.89	78.57
				v-9	26.19	29.37	37.3	46.83	78.57
				v-9	40.48	34.13	56.35	45.24	78.57
				v-9	37.3	26.19	38.89	46.83	78.57
				v-9	30.95	32.54	42.06	45.24	78.57
				v-9	24.6	35.71	29.37	51.59	78.57
				v-9	40.48	26.19	30.95	46.83	78.57
				v-9	50	61.11	50	38.89	78.57
				v-9	38.89	35.71	46.83	46.83	78.57
				v-9	29.37	65.87	42.06	42.06	78.57
				v-9	61.11	34.13	45.24	45.24	78.57
				v-9	40.48	24.6	43.65	45.24	78.57
				v-9	65.87	30.95	34.13	38.89	78.57
				v-9	24.6	35.71	50	43.65	78.57
				v-10	62.5	65.28	56.25	72.22	88.19
				v-10	72.92	52.08	22.22	64.58	88.19
				v-10	65.97	70.83	58.33	68.75	88.19
				v-10	67.36	70.14	15.97	68.75	88.19
				v-10	66.67	75.69	42.36	69.44	88.19
				v-10	64.58	78.47	61.11	68.75	88.19
				v-10	72.92	79.17	49.31	63.89	88.19
				v-10	22.22	68.75	38.89	68.75	88.19
				v-10	67.36	31.94	36.81	64.58	88.19
				v-10	67.36	72.22	31.94	70.83	88.19
				v-10	68.75	59.03	38.19	65.97	88.19
				v-10	61.81	67.36	53.47	70.83	88.19
				v-10	74.31	22.22	40.97	63.19	88.19
				v-10	60.42	69.44	34.03	63.19	88.19
				v-10	69.44	71.53	51.39	65.97	88.19
				v-10	59.72	69.44	36.11	70.14	88.19
				v-10	31.94	68.06	52.78	67.36	88.19
				v-10	72.22	69.44	53.47	64.58	88.19
				v-10	68.06	79.86	65.97	68.75	88.19
				v-10	60.42	72.92	46.53	70.83	88.19
				v-11	91.74	30	27.39	57.83	92.61
				v-11	84.78	43.91	36.96	57.83	92.61
				v-11	27.39	51.74	36.96	45.65	92.61
				v-11	84.78	38.7	74.35	50	92.61
				v-11	27.39	75.22	22.17	57.83	92.61
				v-11	18.7	34.35	70.87	51.74	92.61
				v-11	85.65	70.87	44.78	57.83	92.61
				v-11	43.91	17.83	54.35	56.96	92.61
				v-11	28.26	48.26	88.26	56.96	92.61
				v-11	31.74	43.91	91.74	53.48	92.61
				v-11	42.17	23.91	85.65	56.09	92.61
				v-11	33.48	27.39	27.39	57.83	92.61
				v-11	13.48	86.52	28.26	58.7	92.61
				v-11	37.83	85.65	18.7	55.22	92.61
				v-11	35.22	18.7	28.26	57.83	92.61
				v-11	39.57	87.39	27.39	56.96	92.61
				v-11	54.35	27.39	89.13	54.35	92.61
				v-11	28.26	89.13	21.3	54.35	92.61
				v-11	87.39	30	29.13	51.74	92.61
				v-11	37.83	18.7	23.91	58.7	92.61
				v-12	28.23	30.65	31.85	43.55	89.92
				v-12	33.47	35.48	34.27	46.37	89.92
				v-12	35.48	35.89	20.97	43.15	89.92
				v-12	30.24	33.06	78.23	43.95	89.92
				v-12	75.4	84.27	29.44	47.58	89.92
				v-12	58.06	48.39	28.63	47.18	89.92
				v-12	35.89	28.63	28.23	43.55	89.92
				v-12	28.63	45.16	87.5	44.35	89.92
				v-12	33.06	33.06	34.68	47.58	89.92
				v-12	29.03	42.34	35.48	42.74	89.92
				v-12	28.63	28.23	85.89	47.98	89.92
				v-12	28.23	36.69	33.47	47.18	89.92
				v-12	37.1	28.63	35.89	41.94	89.92
				v-12	86.69	89.92	30.24	49.19	89.92
				v-12	35.89	36.29	46.77	39.11	89.92
				v-12	52.82	43.55	62.9	46.37	89.92
				v-12	21.37	34.27	19.35	45.97	89.92
				v-12	32.26	40.32	49.6	43.15	89.92
				v-12	54.44	46.77	32.26	46.77	89.92
				v-12	46.37	49.6	58.06	44.76	89.92
				v-13	37.78	31.02	31.02	68.98	91.92
				v-13	85.9	36.65	37.78	66.73	91.92
				v-13	28.38	31.77	30.64	64.1	91.92
				v-13	36.65	33.27	31.39	66.35	91.92
				v-13	27.26	29.51	31.02	69.36	91.92
				v-13	43.05	32.14	53.57	70.11	91.92
				v-13	44.17	42.67	38.53	68.98	91.92
				v-13	32.52	25.38	45.3	69.74	91.92
				v-13	38.16	43.05	40.41	67.11	91.92
				v-13	26.5	58.46	26.13	70.86	91.92
				v-13	47.93	42.67	30.64	71.99	91.92
				v-13	64.85	39.29	39.29	68.61	91.92
				v-13	65.23	38.91	61.47	64.85	91.92
				v-13	32.89	41.54	52.82	71.24	91.92
				v-13	54.7	80.26	40.41	67.12	91.92
				v-13	50.94	86.28	38.53	69.36	91.92
				v-13	32.89	85.9	83.65	68.23	91.92
				v-13	32.52	84.02	82.52	68.61	91.92
				v-13	26.13	29.89	66.35	71.62	91.92
				v-13	51.69	30.26	82.52	70.86	91.92
				v-14	84.26	80.32	82.64	79.86	93.52
				v-14	31.25	63.66	47.69	81.25	93.52
				v-14	28.94	22.69	47.92	82.41	93.52
				v-14	36.57	55.32	33.33	78.47	93.52
				v-14	43.06	37.96	24.77	76.85	93.52
				v-14	56.48	57.41	40.28	82.18	93.52
				v-14	43.06	33.8	30.09	82.41	93.52
				v-14	28.47	29.17	31.25	81.94	93.52
				v-14	84.49	80.09	76.16	81.25	93.52
				v-14	81.71	29.86	29.86	81.02	93.52
				v-14	30.09	30.79	30.32	82.41	93.52
				v-14	48.38	33.1	55.56	80.56	93.52
				v-14	24.07	53.24	47.22	76.16	93.52
				v-14	37.04	32.87	46.3	79.4	93.52
				v-14	80.56	49.07	82.87	81.02	93.52
				v-14	25.93	28.47	32.64	78.7	93.52
				v-14	31.94	30.09	31.71	80.56	93.52
				v-14	40.74	69.44	53.24	81.25	93.52
				v-14	84.49	82.87	81.48	76.85	93.52
				v-14	87.27	87.04	86.57	81.48	93.52

## Sheet: 柱状图
APFD
	TC	AC	Random	PORT	L-TCP	O
v-9	39.84	38.25	39.52	44.29	78.57
v-10	62.85	65.69	44.31	67.57	88.19
v-11	46.7	47.48	46.35	55.39	92.61
v-12	40.56	42.56	43.19	45.12	89.92
v-13	43.01	46.15	47.2	68.74	91.55
v-14	50.44	49.36	49.6	80.3	93.52
APFDc
	TC	AC	Random	PORT	L-TCP	O
v-9	41.91	35.66	41.14	57.86	81.6
v-10	64.6	64.1	47.55	68.75	88.31
v-11	48.06	56.5	47.06	52.17	92.64
v-12	47.28	47.43	49.42	50.08	91.75
v-13	50.01	50.9	55.95	71.95	91.47
v-14	55.24	53.6	54.37	80.54	94.28
