# Supplementary material for: Location-Based Test Case Prioritization for Software Embedded in Mobile Devices Using the Law of Gravitation
Source: Hindawi journal article supplement (doi:10.1155/2019/9083956), 2019-01-02
Supplement: f1 [file 9083956.f1.zip › 9083956.f1/results.xlsx]

## Sheet: Chiptest9
L-TCP		TC		AC		Random		PORT
APFD	APFDc	APFD	APFDc	APFD	APFDc	APFD	APFDc	APFD	APFDc
78.57	81.6	42.06	35.76	29.37	19.75	19.84	21.6	45.24	56.6
78.57		61.11	54.32	56.35	61.11	34.13	33.33	51.59	67.9
78.57		56.35	61.11	26.19	18.4	24.6	16.67	40.48	51.39
78.57		26.19	21.6	42.06	35.76	29.37	48.77	40.48	52.47
78.57		29.37	19.75	43.65	40.74	65.87	72.84	43.65	53.47
78.57		32.54	42.59	34.13	32.99	32.54	32.1	42.06	55.56
78.57		38.89	44.44	61.11	82.1	37.3	38.89	38.89	50.62
78.57		26.19	18.52	29.37	20.49	37.3	46.91	46.83	64.81
78.57		40.48	48.77	34.13	33.33	56.35	61.11	45.24	59.88
78.57		37.3	32.72	26.19	18.52	38.89	41.36	46.83	62.35
78.57		30.95	35.19	32.54	26.54	42.06	59.26	45.24	59.88
78.57		24.6	25.31	35.71	33.95	29.37	40.12	51.59	66.67
78.57		40.48	34.57	26.19	17.28	30.95	24.07	46.83	62.35
78.57		50	61.73	61.11	66.05	50	64.2	38.89	50.62
78.57		38.89	35.19	35.71	30.86	46.83	27.16	46.83	62.35
78.57		29.37	40.12	65.87	72.84	42.06	39.51	42.06	60.49
78.57		61.11	82.1	34.13	33.33	45.24	32.1	45.24	55.56
78.57		40.48	44.44	24.6	17.36	43.65	55.56	45.24	54.51
78.57		65.87	72.84	30.95	24.07	34.13	33.33	38.89	53.09
78.57		24.6	27.16	35.71	27.78	50	33.95	43.65	56.6
		39.8415	41.9115	38.2535	35.6625	39.524	41.142	44.2875	57.8585
		Q0	Q1	Q2	Q3	Q4	AVERAGE
	L-TCP	78.57	78.57	78.57	78.57	78.57	78.57
	TC	24.6	29.37	38.89	48.015	65.87	39.8415
	AC	24.6	29.37	34.13	43.2525	65.87	38.2535
	R	19.84	31.3475	38.095	46.4325	65.87	39.524
	PORT	38.89	40.875	45.24	46.83	51.59	44.2875
		Q1	Q0	Q2	Q4	Q3	AVERAGE
	L-TCP	78.57	78.57	78.57	78.57	78.57	78.57
	TC	29.37	24.6	38.89	65.87	48.015	39.8415
	AC	29.37	24.6	34.13	65.87	43.2525	38.2535
	R	31.3475	19.84	38.095	65.87	46.4325	39.524
	PORT	40.875	38.89	45.24	51.59	46.83	44.2875

## Sheet: Chiptest10
L-TCP		TC		AC		Random		PORT
APFD	APFDc	APFD	APFDc	APFD	APFDc	APFD	APFDc	APFD	APFDc
88.19	88.31	62.5	66.19	65.28	62.53	56.25	61.58	72.22	72.9
		72.92	75.21	52.08	49.84	22.22	24.9	64.58	66.09
		65.97	68.71	70.83	68.5	58.33	60.74	68.75	70.07
		67.36	69.86	70.14	70.39	15.97	40.62	68.75	70.07
		66.67	71.02	75.69	73.64	42.36	45.86	69.44	70.81
		64.58	65.88	78.47	77.2	61.11	61.69	68.75	70.07
		72.92	75.63	79.17	78.46	49.31	69.97	63.89	64.83
		22.22	24.9	68.75	67.66	38.89	33.18	68.75	69.65
		67.36	70.28	31.94	25.94	36.81	39.05	64.58	65.99
		67.36	66.82	72.22	70.6	31.94	25.94	70.83	72.27
		68.75	70.07	59.03	55.4	38.19	32.55	65.97	66.82
		61.81	64.41	67.36	66.09	53.47	39.99	70.83	72.17
		74.31	76.89	22.22	24.9	40.97	53.93	63.19	64.73
		60.42	63.57	69.44	68.29	34.03	47.54	63.19	64.73
		69.44	68.5	71.53	71.02	51.39	41.46	65.97	66.82
		59.72	60.64	69.44	67.56	36.11	59.7	70.14	70.91
		31.94	25.94	68.06	66.4	52.78	55.08	67.36	68.71
		72.22	74.58	69.44	68.29	53.47	53.09	64.58	65.46
		68.06	70.28	79.86	78.56	65.97	71.44	68.75	69.65
		60.42	62.53	72.92	70.7	46.53	32.76	70.83	72.27
		62.8475	64.5955	65.6935	64.0985	44.305	47.5535	67.5675	68.751

## Sheet: Chiptest11
L-TCP		TC		AC		Random		PORT
APFD	APFDc	APFD	APFDc	APFD	APFDc	APFD	APFDc	APFD	APFDc
92.61	92.64	91.74	91.14	30	29.93	27.39	27.42	57.83	54.68
92.61	92.64	84.78	84.78	43.91	41.47	36.96	17.73	57.83	54.68
		27.39	27.42	51.74	73.57	36.96	81.94	45.65	41.3
		84.78	85.79	38.7	84.62	74.35	66.72	50	45.82
		27.39	27.42	75.22	47.83	22.17	46.32	57.83	54.68
		18.7	18.23	34.35	71.57	70.87	61.37	51.74	48.66
		85.65	85.62	70.87	80.77	44.78	45.32	57.83	54.68
		43.91	41.47	17.83	48.83	54.35	37.96	56.96	54.18
		28.26	28.43	48.26	60.7	88.26	88.8	56.96	53.85
		31.74	31.77	43.91	70.23	91.74	91.14	53.48	50.5
		42.17	30.77	23.91	49.67	85.65	85.28	56.09	53.18
		33.48	44.31	27.39	27.42	27.39	27.42	57.83	54.68
		13.48	17.22	86.52	87.79	28.26	27.26	58.7	55.69
		37.83	46.49	85.65	84.62	18.7	18.23	55.22	52.01
		35.22	43.31	18.7	18.23	28.26	28.6	57.83	54.68
		39.57	30.27	87.39	88.46	27.39	27.42	56.96	54.18
		54.35	50	27.39	27.42	89.13	89.97	54.35	51.17
		28.26	28.93	89.13	88.8	21.3	20.23	54.35	51.34
		87.39	86.62	30	29.93	29.13	28.76	51.74	47.66
		37.83	61.2	18.7	18.23	23.91	23.24	58.7	55.69
		46.696	48.0595	47.4785	56.5045	46.3475	47.0565	55.394	52.1655

## Sheet: Chiptest12
L-TCP		TC		AC		Random		PORT
APFD	APFDc	APFD	APFDc	APFD	APFDc	APFD	APFDc	APFD	APFDc
89.92	91.75	28.23	32.3	30.65	55.07	31.85	34.42	43.55	47.51
		33.47	33.13	35.48	38.02	34.27	34.79	46.37	50.55
		35.48	38.02	35.89	39.95	20.97	46.59	43.15	48.34
		30.24	49.72	33.06	36.82	78.23	76.27	43.95	47.33
		75.4	69.08	84.27	75.35	29.44	36.91	47.58	52.21
		58.06	44.75	48.39	33.32	28.63	30.74	47.18	50.28
		35.89	61.15	28.63	30.74	28.23	32.3	43.55	49.17
		28.63	30.74	45.16	68.06	87.5	81.89	44.35	47.88
		33.06	33.5	33.06	36.82	34.68	40.6	47.58	53.04
		29.03	55.25	42.34	55.81	35.48	38.02	42.74	49.26
		28.63	30.74	28.23	32.3	85.89	83.09	47.98	52.21
		28.23	33.87	36.69	37.74	33.47	35.71	47.18	52.58
		37.1	40.88	28.63	30.74	35.89	39.95	41.94	48.99
		86.69	84.1	89.92	84.75	30.24	34.88	49.19	54.42
		35.89	39.95	36.29	39.31	46.77	47.51	39.11	47.24
		52.82	55.9	43.55	46.31	62.9	69.54	46.37	51.94
		21.37	49.08	34.27	54.79	19.35	30.37	45.97	50.28
		32.26	46.22	40.32	45.94	49.6	65.94	43.15	48.25
		54.44	53.32	46.77	52.49	32.26	66.59	46.77	51.75
		46.37	63.92	49.6	54.24	58.06	62.35	44.76	48.43
		40.5645	47.281	42.56	47.4285	43.1855	49.423	45.121	50.083

## Sheet: Chiptest13
L-TCP		TC		AC		Random		PORT
APFD	APFDc	APFD	APFDc	APFD	APFDc	APFD	APFDc	APFD	APFDc
91.92	91.79	37.78	38.73	31.02	30.97	31.02	31.12	68.98	72.01
91.17	91.15	85.9	86.24	36.65	36.67	37.78	37.8	66.73	69.95
91.545	91.47	28.38	27.84	31.77	32.25	30.64	30.69	64.1	67.75
		36.65	36.59	33.27	33.53	31.39	50.68	66.35	69.45
		27.26	52.95	29.51	30.12	31.02	52.38	69.36	72.44
		43.05	56.22	32.14	32.82	53.57	76.78	70.11	73.08
		44.17	54.16	42.67	62.48	38.53	46.48	68.98	72.3
		32.52	32.75	25.38	26.28	45.3	62.27	69.74	72.8
		38.16	41.15	43.05	43.63	40.41	48.76	67.11	70.52
		26.5	27.77	58.46	57.01	26.13	44.91	70.86	74.08
		47.93	52.67	42.67	61.56	30.64	52.24	71.99	75
		64.85	76.14	39.29	57.43	39.29	40.08	68.61	71.66
		65.23	83.18	38.91	53.17	61.47	76.92	64.85	68.53
		32.89	39.72	41.54	61.63	52.82	58.07	71.24	74.5
		54.7	54.66	80.26	80.83	40.41	47.55	67.12	70.16
		50.94	54.37	86.28	86.02	38.53	46.83	69.36	72.58
		32.89	43.49	85.9	86.52	83.65	84.25	68.23	71.66
		32.52	34.32	84.02	84.46	82.52	81.83	68.61	71.94
		26.13	38.37	29.89	30.05	66.35	67.25	71.62	74.64
		51.69	68.81	30.26	30.62	82.52	82.11	70.86	74
		43.007	50.0065	46.147	50.9025	47.1995	55.95	68.7405	71.9525

## Sheet: Chiptest14
L-TCP		TC		AC		Random		PORT
APFD	APFDc	APFD	APFDc	APFD	APFDc	APFD	APFDc	APFD	APFDc
93.52	94.28	84.26	85.87	80.32	81.08	82.64	82.08	79.86	80.08
		31.25	30.89	63.66	60.28	47.69	71.39	81.25	81.65
		28.94	31.6	22.69	65.98	47.92	40.34	82.41	82.83
		36.57	57.43	55.32	54.77	33.33	29.42	78.47	78.61
		43.06	65.12	37.96	49.64	24.77	52.59	76.85	77.47
		56.48	41	57.41	78.09	40.28	54.53	82.18	82.5
		43.06	63.22	33.8	31.32	30.09	29.61	82.41	82.36
		28.47	28.51	29.17	28.7	31.25	29.94	81.94	82.17
		84.49	85.54	80.09	79.94	76.16	78.18	81.25	80.94
		81.71	84.31	29.86	28.7	29.86	28.56	81.02	81.51
		30.09	29.75	30.79	30.65	30.32	29.61	82.41	82.64
		48.38	46.23	33.1	20.92	55.56	52.35	80.56	80.32
		24.07	49.88	53.24	65.46	47.22	47.32	76.16	76.28
		37.04	24.81	32.87	59.19	46.3	70.73	79.4	79.08
		80.56	81.86	49.07	40.34	82.87	83.26	81.02	81.74
		25.93	25.14	28.47	28.51	32.64	31.79	78.7	79.32
		31.94	31.36	30.09	29.23	31.71	32.12	80.56	81.08
		40.74	70.58	69.44	69.25	53.24	74.86	81.25	81.79
		84.49	85.11	82.87	82.83	81.48	81.17	76.85	77.14
		87.27	86.68	87.04	87.2	86.57	87.63	81.48	81.22
		50.44	55.2445	49.363	53.604	49.595	54.374	80.3015	80.5365
